# Supplementary material
Source: PubMed Central journal article supplement (PMC4621781)
Supplement: NIHMS720756-supplement-1.pdf [file NIHMS720756-supplement-1.pdf]

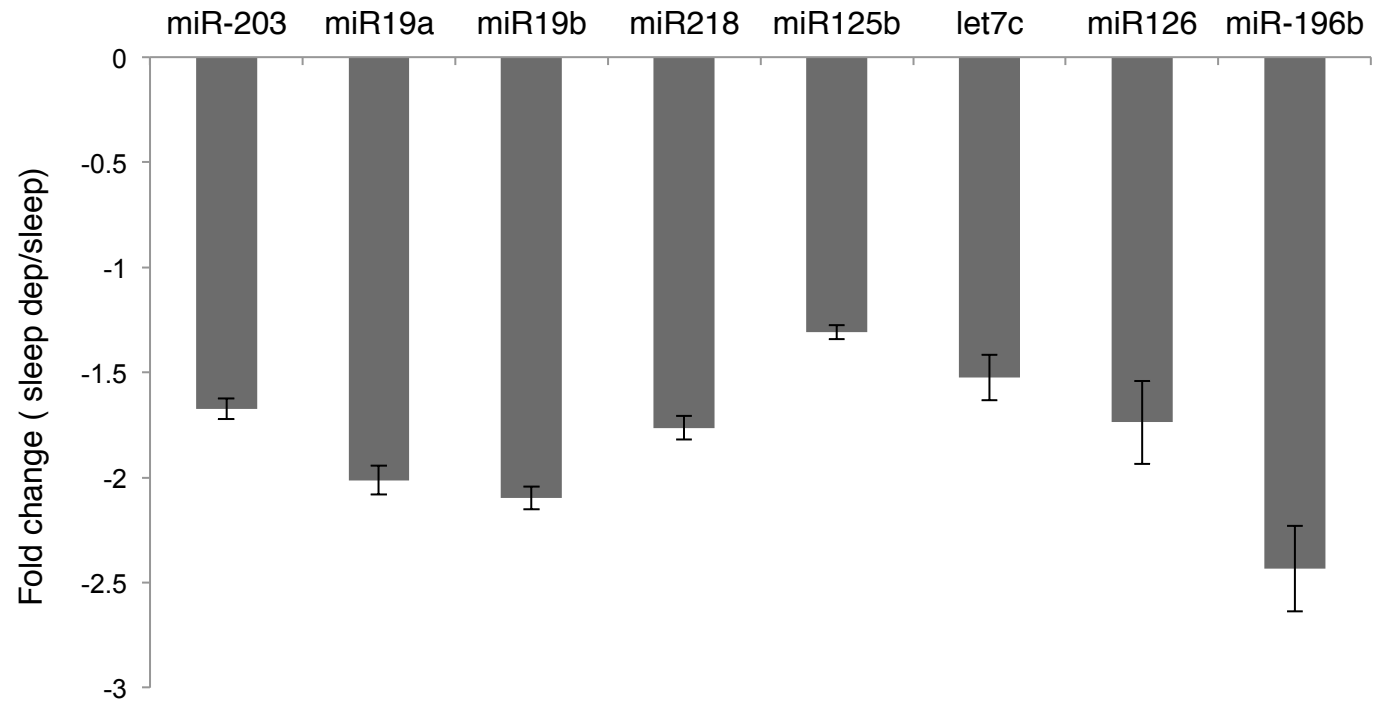

**Supplementary Figure 1: Validation of microRNAs array by quantitative PCR.** Individual Taqman probes were used for qPCR analysis of specific microRNAs. Results are presented as fold of change (Sleep dep (SD)/sleep).
